# Supplementary material
Source: PubMed Central journal article supplement (PMC4551754)
Supplement: ijbsv11p1181s1.pdf [file ijbsv11p1181s1.pdf]

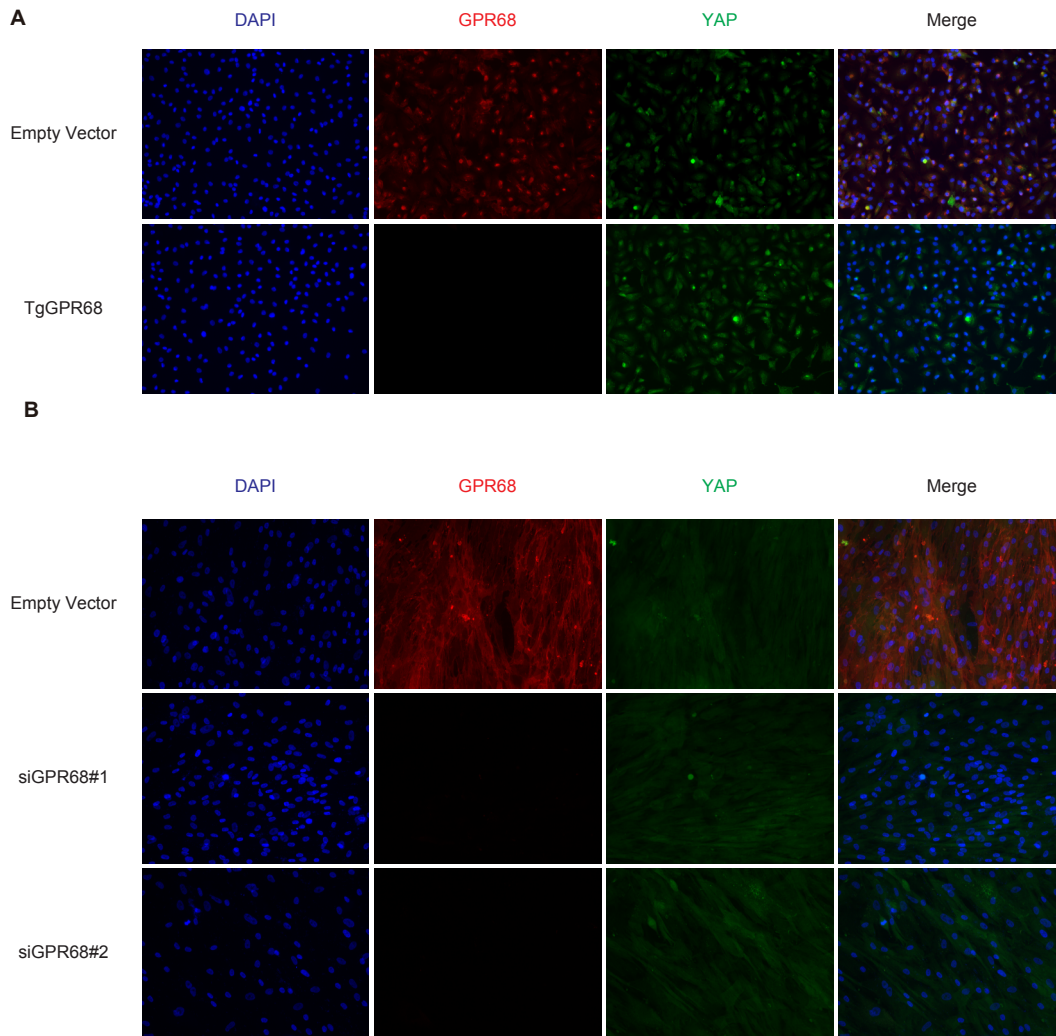

Figure S1. YAP activities are not affected by GPR68 at normal pH. (A) ACs were transfected with empty vector or GPR68 vector and cultured at pH=7.4 for 3 hours. (B) BMSCs transfected with control siRNA or GPR68 siRNA and cultured at pH=7.4 for 3 hours. All experiments were performed at least 3 times.

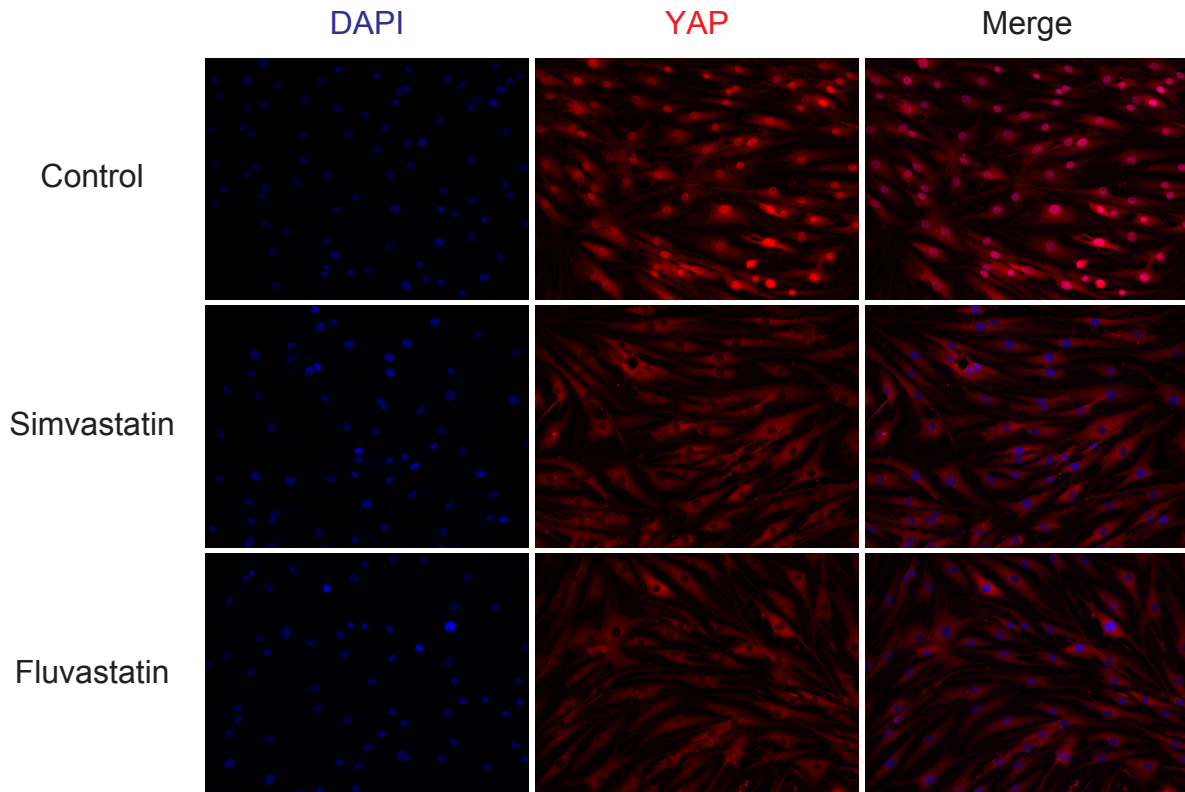

Figure S2 Statin inhibit YAP activities. Nuclear localization of YAP induced by low extracellular pH is blocked by statins. BMSCs were with simvastatin (10 $\mu$ M) or fluvastatin (10 $\mu$ M) at pH=7.0 for 3 hours. All experiments were performed at least 3 times.
